# Supplementary material for: Effects of Four Cropping Patterns of Lilium brownii on Rhizosphere Microbiome Structure and Replant Disease
Source: MDPI journal article supplement (doi:10.3390/plants11060824), 2022-03-20
Supplement: s1 [file s1]

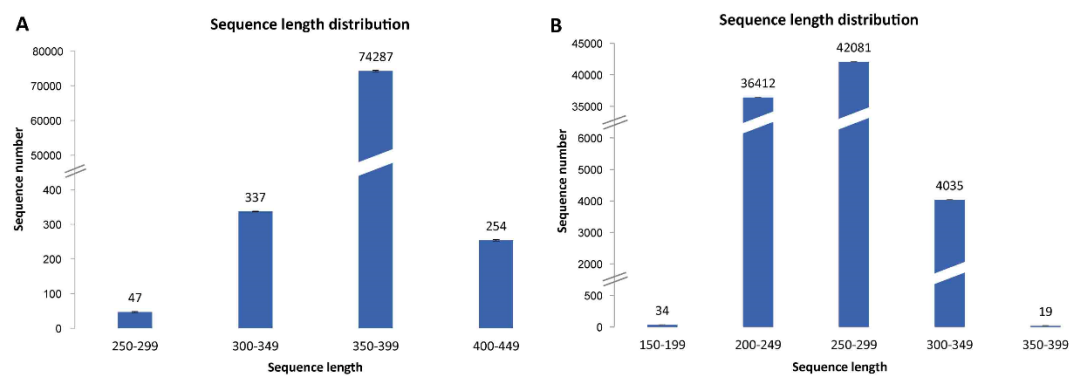

**Supplementary Figure S1.** Histogram of the distribution of microorganism sequence lengths (A: bacterial; B: fungal) Note: x-axis: bp; y-axis: band size

A

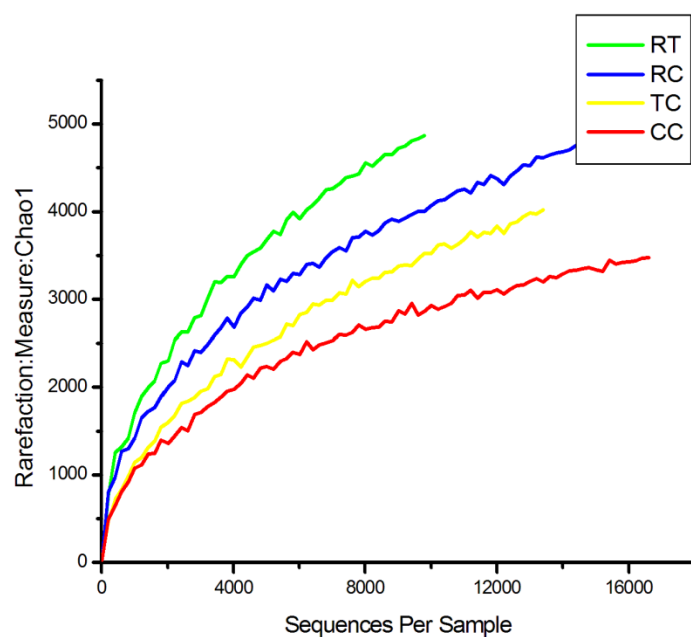

B

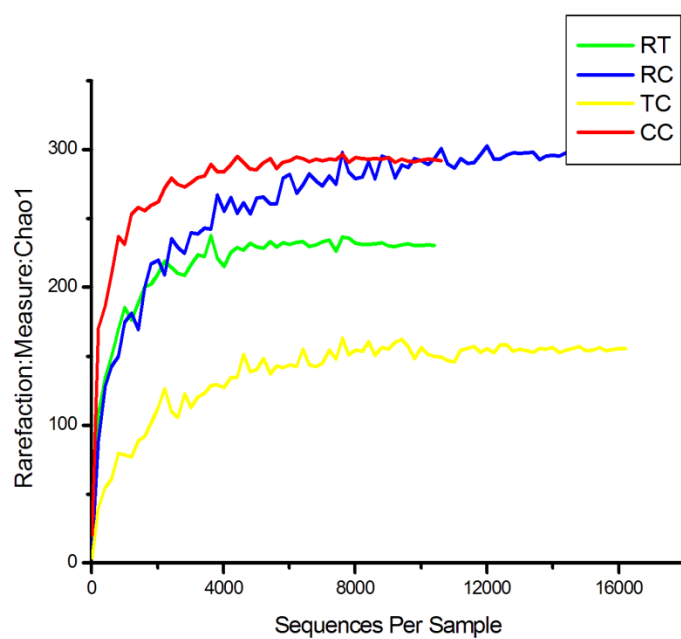

**Supplementary Figure S2.** Comparison of microorganism abundance as determined by 16S sequences and ITS sequences of different samples (A: bacterial; B: fungal) Note: x-axis: bands; y-axis: OTU

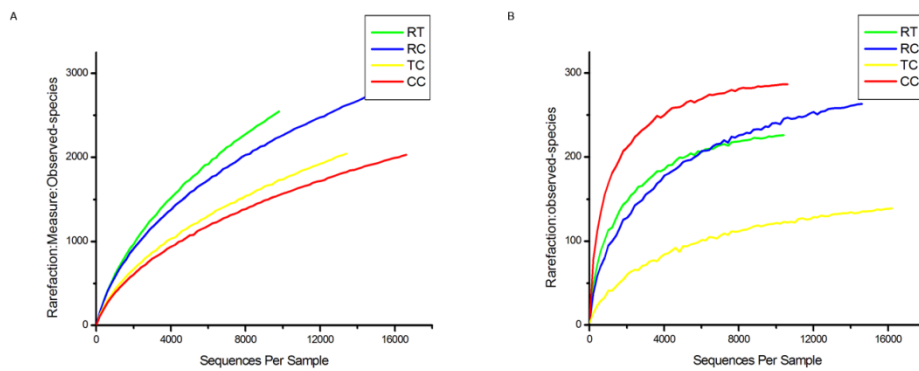

**Supplementary Figure S3.** Comparison of the number of microorganism observed species as assessed by 16S sequences and ITS sequences of different samples (A: bacterial; B: fungal) Note: x-axis: bands; y-axis: OUT

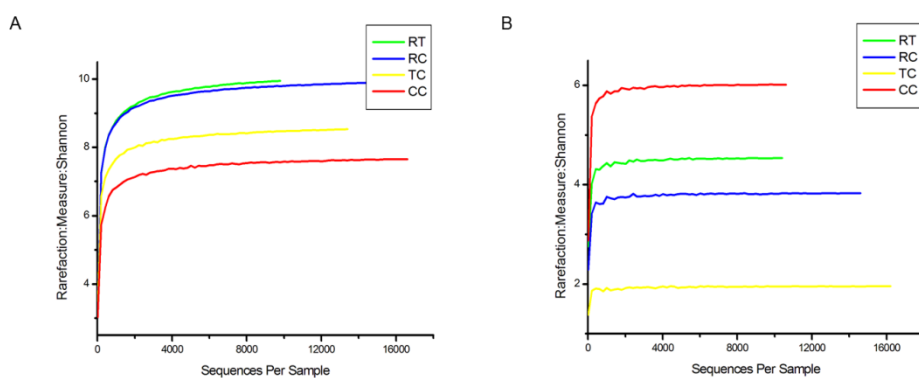

**Supplementary Figure S4.** Comparison of microbial diversity by 16S sequences and ITS sequences of different samples (A: bacterial; B: fungal) Note: x-axis: bands; y-axis: Shannon index
