# Supplementary material for: Effects of Four Cropping Patterns of Lilium brownii on Rhizosphere Microbiome Structure and Replant Disease
Source: MDPI journal article supplement (doi:10.3390/plants11060824), 2022-03-20
Supplement: s1 [file s1]

**Supplementary Table S1 (Anova-Data).** The pH values in three stages of growth of *L. brownii*.

| Treatment | pH                        |      |      |                          |                    |      |      |                          |                           |      |      |                          |
|-----------|---------------------------|------|------|--------------------------|--------------------|------|------|--------------------------|---------------------------|------|------|--------------------------|
|           | Seedling emergence period |      |      |                          | Flourishing period |      |      |                          | (Bulblet) Expanding stage |      |      |                          |
|           | I                         | II   | III  | Average Value            | I                  | II   | III  | Average Value            | I                         | II   | III  | Average Value            |
| RT        | 6.71                      | 6.71 | 6.65 | 6.69 ± 0.03 <sup>a</sup> | 6.49               | 6.51 | 6.41 | 6.47 ± 0.05 <sup>b</sup> | 6.55                      | 6.52 | 6.51 | 6.53 ± 0.02 <sup>b</sup> |
| RC        | 6.66                      | 6.5  | 6.34 | 6.50 ± 0.16 <sup>b</sup> | 5.92               | 5.95 | 5.86 | 5.91 ± 0.05 <sup>c</sup> | 5.64                      | 5.76 | 5.55 | 5.65 ± 0.11 <sup>d</sup> |
| TC        | 5.18                      | 5.38 | 5.19 | 5.25 ± 0.11 <sup>e</sup> | 4.66               | 4.71 | 4.58 | 4.65 ± 0.07 <sup>e</sup> | 4.59                      | 4.68 | 4.55 | 4.61 ± 0.07 <sup>g</sup> |
| CC        | 4.95                      | 4.87 | 4.91 | 4.91 ± 0.04 <sup>f</sup> | 4.41               | 4.42 | 4.37 | 4.40 ± 0.03 <sup>h</sup> | 4.36                      | 4.25 | 4.39 | 4.33 ± 0.07 <sup>h</sup> |

Note: Numbers with different letters in the same column are significantly different according to Duncan's shortest significant range test ( $P < 0.05$ ).

**Table S1.1** Variance analysis of different cropping patterns (ANOVA)

| Sources of variation | Sum of squares | Degrees of freedom | Mean square | F Value | p Value |
|----------------------|----------------|--------------------|-------------|---------|---------|
| A between factors    | 8.8856         | 3                  | 2.9619      | 491.111 | 0.0001  |
| B between factors    | 0.0055         | 2                  | 0.0028      | 0.457   | 0.6386  |
| AxB                  | 18.4177        | 6                  | 3.0696      | 508.978 | 0.0001  |
| Error                | 0.1447         | 24                 | 0.006       |         |         |
| Total variation      | 27.4535        | 35                 |             |         |         |

Note: A: Cropping pattern factor; B: Time factor;

**Supplementary Table S2 (Anova-Data).** Population abundance of the dominant fungi genera under four planting patterns (%)

| Genera                | RT    |      |      |                         | RC    |       |       |                         | TC    |       |       |                         | CC   |      |       |                          |
|-----------------------|-------|------|------|-------------------------|-------|-------|-------|-------------------------|-------|-------|-------|-------------------------|------|------|-------|--------------------------|
|                       | I     | II   | III  | Average Value           | I     | II    | III   | Average Value           | I     | II    | III   | Average Value           | I    | II   | III   | Average Value            |
| <i>Arthrobotrys</i>   | 0     | 0    | 0    | 0                       | 0.009 | 0.013 | 0.009 | 0.01±0.002 <sup>d</sup> |       |       |       | 0                       | 0.67 | 0.66 | 0.62  | 0.65±0.030 <sup>h</sup>  |
| <i>Aspergillus</i>    | 0     | 0    | 0    | 0                       |       |       |       | 0                       | 0.008 | 0.011 | 0.011 | 0.01±0.002 <sup>d</sup> | 1.96 | 1.95 | 1.82  | 1.91±0.080 <sup>d</sup>  |
| <i>Colletotrichum</i> | 0     | 0    | 0    | 0                       |       |       |       | 0                       | 0.022 | 0.014 | 0.024 | 0.02±0.005 <sup>d</sup> | 0.52 | 0.54 | 0.56  | 0.54±0.020 <sup>i</sup>  |
| <i>Cordyceps</i>      | 0.81  | 0.74 | 0.79 | 0.78±0.040 <sup>a</sup> | 0.025 | 0.034 | 0.032 | 0.03±0.005 <sup>d</sup> | 0.1   | 0.15  | 0.14  | 0.13±0.026 <sup>c</sup> | 2.38 | 2.39 | 2.251 | 2.34±0.078 <sup>c</sup>  |
| <i>Fusarium</i>       | 0.14  | 0.18 | 0.16 | 0.16±0.020 <sup>c</sup> | 0.89  | 0.9   | 0.82  | 0.87±0.044 <sup>a</sup> | 0.89  | 0.85  | 0.87  | 0.87±0.020 <sup>a</sup> | 2.65 | 2.81 | 2.82  | 2.76±0.095 <sup>b</sup>  |
| <i>Humicola</i>       | 0     | 0    | 0    | 0                       | 0.26  | 0.2   | 0.2   | 0.22±0.035 <sup>b</sup> |       |       |       | 0                       | 1.77 | 1.85 | 1.78  | 1.80±0.044 <sup>e</sup>  |
| <i>Myrothecium</i>    | 0.019 | 0.02 | 0.02 | 0.02±0.002 <sup>d</sup> | 0     | 0.02  | 0.01  | 0.01±0.001 <sup>d</sup> |       |       |       | 0                       | 0.88 | 0.85 | 0.79  | 0.84±0.046 <sup>g</sup>  |
| <i>Penicillium</i>    | 0     | 0    | 0    | 0                       | 0.17  | 0.15  | 0.13  | 0.15±0.020 <sup>c</sup> | 0.32  | 0.28  | 0.21  | 0.27±0.055 <sup>b</sup> | 6.15 | 6.16 | 6.02  | 6.11±0.078 <sup>a</sup>  |
| <i>Peniophora</i>     | 0.55  | 0.54 | 0.5  | 0.53±0.030 <sup>b</sup> |       |       |       | 0                       |       |       |       | 0                       | 0.11 | 0.14 | 0.111 | 0.12±0.017 <sup>j</sup>  |
| <i>Phialosimplex</i>  | 0     | 0    | 0    | 0                       |       |       |       | 0                       |       |       |       | 0                       | 0.63 | 0.66 | 0.63  | 0.64±0.017 <sup>h</sup>  |
| <i>Phlebia</i>        | 0     | 0    | 0    | 0                       |       |       |       | 0                       |       |       |       | 0                       | 0.55 | 0.58 | 0.55  | 0.56±0.017 <sup>hi</sup> |
| <i>Rhodotorula</i>    | 0     | 0    | 0    | 0                       | 0.04  | 0.03  | 0.02  | 0.03±0.001 <sup>d</sup> |       |       |       | 0                       | 0.92 | 0.94 | 0.93  | 0.93±0.010 <sup>f</sup>  |

Note: Numbers with different letters in the same column are significantly different according to Duncan's shortest significant range test ( $P < 0.05$ ).

| Supplementary Table S2.1 ANOVA |                     |                |                    |             |          |         |
|--------------------------------|---------------------|----------------|--------------------|-------------|----------|---------|
| Sample                         | Source of variation | Sum of squares | Degrees of freedom | Mean square | F Value  | p Value |
| RT                             | Treatment between   | 2.1911         | 11                 | 0.1992      | 995.809  | 0.0001  |
|                                | Treatment interior  | 0.0048         | 24                 | 0.0002      |          |         |
|                                | Total variation     | 2.1959         | 35                 |             |          |         |
| RC                             | Treatment between   | 2.0534         | 11                 | 0.1867      | 600.944  | 0.0001  |
|                                | Treatment interior  | 0.0075         | 24                 | 0.0003      |          |         |
|                                | Total variation     | 2.0609         | 35                 |             |          |         |
| TC                             | Treatment between   | 2.1191         | 11                 | 0.1926      | 546.383  | 0.0001  |
|                                | Treatment interior  | 0.0085         | 24                 | 0.0004      |          |         |
|                                | Total variation     | 2.1276         | 35                 |             |          |         |
| CC                             | Treatment between   | 88.8453        | 11                 | 8.0768      | 2901.804 | 0.0001  |
|                                | Treatment interior  | 0.0668         | 24                 | 0.0028      |          |         |
|                                | Total variation     | 88.9121        | 35                 |             |          |         |

**Supplementary Table S3A (Anova-Data)** Histogram of the distribution of microorganism sequence lengths (bacterial)

| Sequence length (bp) | Sequence number |          |          | Average Value              |
|----------------------|-----------------|----------|----------|----------------------------|
|                      | I               | II       | III      |                            |
| 250~299              | 41.00           | 43.00    | 40.00    | 41.33±1.53 <sup>d</sup>    |
| 300~349              | 338.00          | 337.00   | 336.00   | 337.00±1.00 <sup>b</sup>   |
| 350~399              | 74288.00        | 74289.00 | 74285.00 | 74287.33±2.08 <sup>a</sup> |
| 400~449              | 252.00          | 255.00   | 256.00   | 254.33±2.08 <sup>c</sup>   |

Note: Numbers with different letters in the same column are significantly different according to Duncan's shortest significant range test ( $P < 0.05$ ).

| Supplementary Table S3.1A ANOVA |                |                    |             |            |         |
|---------------------------------|----------------|--------------------|-------------|------------|---------|
| Source of variation             | Sum of squares | Degrees of freedom | Mean square | F Value    | p Value |
| Treatment between               | 12346608770    | 3                  | 4115536257  | 1371845528 | 0.0001  |
| Treatment interior              | 24             | 8                  | 3           |            |         |
| Total variation                 | 12346608794    | 11                 |             |            |         |

**Supplementary Table S3B (Anova-Data)** Histogram of the distribution of microorganism sequence lengths (fungal)

| Sequence length (bp) | Sequence number |          |          | Average Value              |
|----------------------|-----------------|----------|----------|----------------------------|
|                      | I               | II       | III      |                            |
| 150~199              | 35.00           | 33.00    | 35.00    | 34.33±1.15 <sup>d</sup>    |
| 200~249              | 36410.00        | 36416.00 | 36411.00 | 36412.33±3.21 <sup>b</sup> |
| 250~299              | 42081.00        | 42078.00 | 42085.00 | 42081.33±3.51 <sup>a</sup> |
| 300~349              | 4036.00         | 4033.00  | 4036.00  | 4035.00±1.73 <sup>c</sup>  |
| 350~399              | 18.00           | 21.00    | 18.00    | 19.00±1.73 <sup>e</sup>    |

Note: Numbers with different letters in the same column are significantly different according to Duncan's shortest significant range test ( $P < 0.05$ ).

| Supplementary Table S3.1B ANOVA |                |                    |             |             |         |
|---------------------------------|----------------|--------------------|-------------|-------------|---------|
| Source of variation             | Sum of squares | Degrees of freedom | Mean square | F Value     | p Value |
| Treatment between               | 5247066162     | 4                  | 1311766540  | 218627756.7 | 0.0001  |
| Treatment interior              | 60             | 10                 | 6           |             |         |
| Total variation                 | 5247066222     | 14                 |             |             |         |

**Supplementary Table S4A (Anova-Data)** Comparison of microorganism abundance as determined by 16S sequences of different samples (maximum value)

| Sequences Per Sample | Rarefaction Measure: chao1 |         |         |                                 |
|----------------------|----------------------------|---------|---------|---------------------------------|
|                      | I                          | II      | III     | Average Value                   |
| RT                   | 4868.00                    | 4862.00 | 4871.00 | 4867.00 $\pm$ 4.58 <sup>b</sup> |
| RC                   | 4889.00                    | 4893.00 | 4894.00 | 4892.00 $\pm$ 2.65 <sup>a</sup> |
| TC                   | 4016.00                    | 4021.00 | 4018.00 | 4018.33 $\pm$ 2.52 <sup>c</sup> |
| CC                   | 3473.00                    | 3476.00 | 3476.00 | 3475.00 $\pm$ 1.73 <sup>d</sup> |

Note: Numbers with different letters in the same column are significantly different according to Duncan's shortest significant range test ( $P < 0.05$ ).

| Supplementary Table S4.1A ANOVA |                |                    |             |            |         |
|---------------------------------|----------------|--------------------|-------------|------------|---------|
| Source of variation             | Sum of squares | Degrees of freedom | Mean square | F Value    | p Value |
| Treatment between               | 4293688        | 3                  | 1431229     | 153346.009 | 0.0001  |
| Treatment interior              | 74.6667        | 8                  | 9.3333      |            |         |
| Total variation                 | 4293763        | 11                 |             |            |         |

**Supplementary Table S4B (Anova-Data)** Comparison of microorganism abundance as determined by ITS sequences of different samples (maximum value)

| Sequences Per Sample | Rarefaction Measure: chao1 |        |        |                          |
|----------------------|----------------------------|--------|--------|--------------------------|
|                      | I                          | II     | III    | Average Value            |
| RT                   | 229.60                     | 230.80 | 231.10 | 230.50±0.79 <sup>b</sup> |
| RC                   | 299.90                     | 292.70 | 296.80 | 296.47±3.61 <sup>a</sup> |
| TC                   | 153.20                     | 159.60 | 154.90 | 155.90±3.32 <sup>c</sup> |
| CC                   | 288.70                     | 294.80 | 291.70 | 291.73±3.05 <sup>a</sup> |

Note: Numbers with different letters in the same column are significantly different according to Duncan's shortest significant range test ( $P < 0.05$ ).

| Supplementary Table S4.1B ANOVA |                |                    |             |          |         |
|---------------------------------|----------------|--------------------|-------------|----------|---------|
| Source of variation             | Sum of squares | Degrees of freedom | Mean square | F Value  | p Value |
| Treatment between               | 38923.78       | 3                  | 12974.59    | 1527.926 | 0.0001  |
| Treatment interior              | 67.9331        | 8                  | 8.4916      |          |         |
| Total variation                 | 38991.71       | 11                 |             |          |         |

**Supplementary Table S5A (Anova-Data)** Comparison of the number of microorganism observed species as assessed by 16S sequences of different samples (maximum value)

| Sequences Per Sample | Rarefaction Measure: Observed-species |         |         |                            |
|----------------------|---------------------------------------|---------|---------|----------------------------|
|                      | I                                     | II      | III     | Average Value              |
| RT                   | 2548.00                               | 2542.00 | 2549.00 | 2546.33 ±3.79 <sup>b</sup> |
| RC                   | 2797.00                               | 2798.00 | 2800.00 | 2798.33 ±1.53 <sup>a</sup> |
| TC                   | 2042.00                               | 2044.00 | 2042.00 | 2042.67 ±1.15 <sup>c</sup> |
| CC                   | 2028.00                               | 2027.00 | 2024.00 | 2026.33 ±2.08 <sup>d</sup> |

Note: Numbers with different letters in the same column are significantly different according to Duncan's shortest significant range test ( $P < 0.05$ ).

| Supplementary Table S5.1A ANOVA |                |                    |             |           |         |
|---------------------------------|----------------|--------------------|-------------|-----------|---------|
| Source of variation             | Sum of squares | Degrees of freedom | Mean square | F Value   | p Value |
| Treatment between               | 1316150        | 3                  | 438716.8    | 78576.134 | 0.0001  |
| Treatment interior              | 44.6667        | 8                  | 5.5833      |           |         |
| Total variation                 | 1316195        | 11                 |             |           |         |



**Supplementary Table S5B (Anova-Data)** Comparison of the number of microorganism observed species as assessed by ITS sequences of different samples (maximum value)

| Sequences Per Sample | Rarefaction Measure: Observed-species |        |        |                          |
|----------------------|---------------------------------------|--------|--------|--------------------------|
|                      | I                                     | II     | III    | Average Value            |
| RT                   | 228.30                                | 227.50 | 225.00 | 226.93±1.72 <sup>c</sup> |
| RC                   | 264.10                                | 263.60 | 262.00 | 263.23±1.10 <sup>b</sup> |
| TC                   | 139.90                                | 141.60 | 135.40 | 138.97±3.20 <sup>d</sup> |
| CC                   | 285.40                                | 285.80 | 289.00 | 286.73±1.97 <sup>a</sup> |

Note: Numbers with different letters in the same column are significantly different according to Duncan's shortest significant range test ( $P < 0.05$ ).

| Supplementary Table S5.1B ANOVA |                |                    |             |          |         |
|---------------------------------|----------------|--------------------|-------------|----------|---------|
| Source of variation             | Sum of squares | Degrees of freedom | Mean square | F Value  | p Value |
| Treatment between               | 37845.98       | 3                  | 12615.33    | 2753.928 | 0.0001  |
| Treatment interior              | 36.6468        | 8                  | 4.5808      |          |         |
| Total variation                 | 37882.63       | 11                 |             |          |         |

**Supplementary Table S6A (Anova-Data)** Comparison of microbial diversity (Shannon) by 16S sequences of different samples (maximum value)

| Sequences Per Sample | Rarefaction Measure: Shannon |      |      |                        |
|----------------------|------------------------------|------|------|------------------------|
|                      | I                            | II   | III  | Average Value          |
| RT                   | 9.98                         | 9.96 | 9.92 | 9.95±0.03 <sup>a</sup> |
| RC                   | 9.93                         | 9.81 | 9.97 | 9.90±0.08 <sup>a</sup> |
| TC                   | 8.55                         | 8.49 | 8.56 | 8.53±0.04 <sup>b</sup> |
| CC                   | 7.68                         | 7.62 | 7.65 | 7.65±0.03 <sup>c</sup> |

Note: Numbers with different letters in the same column are significantly different according to Duncan's shortest significant range test ( $P < 0.05$ ).

| Supplementary Table S6.1A ANOVA |                |                    |             |          |         |
|---------------------------------|----------------|--------------------|-------------|----------|---------|
| Source of variation             | Sum of squares | Degrees of freedom | Mean square | F Value  | p Value |
| Treatment between               | 11.2942        | 3                  | 3.7647      | 1476.367 | 0.0001  |
| Treatment interior              | 0.0204         | 8                  | 0.0025      |          |         |
| Total variation                 | 11.3146        | 11                 |             |          |         |

**Supplementary Table S6B (Anova-Data)** Comparison of microbial diversity (Shannon) by ITS sequences of different samples (maximum value)

| Sequences Per Sample | Rarefaction Measure: Shannon |      |       |                        |
|----------------------|------------------------------|------|-------|------------------------|
|                      | I                            | II   | III   | Average Value          |
| RT                   | 4.58                         | 4.52 | 4.503 | 4.53±0.04 <sup>b</sup> |
| RC                   | 3.93                         | 3.59 | 3.96  | 3.83±0.21 <sup>c</sup> |
| TC                   | 1.93                         | 2.11 | 1.85  | 1.96±0.13 <sup>d</sup> |
| CC                   | 6.06                         | 6.21 | 5.78  | 6.02±0.23 <sup>a</sup> |

Note: Numbers with different letters in the same column are significantly different according to Duncan's shortest significant range test ( $P < 0.05$ ).

| Supplementary Table S6.1B ANOVA |                |                    |             |         |         |
|---------------------------------|----------------|--------------------|-------------|---------|---------|
| Source of variation             | Sum of squares | Degrees of freedom | Mean square | F Value | p Value |
| Treatment between               | 25.5043        | 3                  | 8.5014      | 311.305 | 0.0001  |
| Treatment interior              | 0.2185         | 8                  | 0.0273      |         |         |
| Total variation                 | 25.7228        | 11                 |             |         |         |

**Supplementary Table S7.** Population abundance of the dominant bacteria 20 families under four planting patterns (%)

| Taxon                              | RT    |         |       |                          | RC    |       |       |                         | TC    |       |       |                         | CC    |       |       |                         |
|------------------------------------|-------|---------|-------|--------------------------|-------|-------|-------|-------------------------|-------|-------|-------|-------------------------|-------|-------|-------|-------------------------|
|                                    | I     | II      | III   | Average Value            | I     | II    | III   | Average Value           | I     | II    | III   | Average Value           | I     | II    | III   | Average Value           |
| Acidobacteriaceae                  | 0.001 | 0.00001 | 0.001 | 0.00±0.00 <sup>q</sup>   | 7.43  | 7.27  | 7.41  | 7.37±0.09 <sup>c</sup>  | 17.29 | 17.26 | 17.26 | 17.27±0.02 <sup>b</sup> | 6.18  | 6.26  | 6.17  | 6.20±0.05 <sup>d</sup>  |
| Chitinophagaceae                   | 2.89  | 2.91    | 2.81  | 2.87±0.05 <sup>j</sup>   | 1.98  | 1.97  | 1.93  | 1.96±0.03 <sup>n</sup>  | 1.18  | 1.14  | 1.26  | 1.19±0.06 <sup>i</sup>  | 1.62  | 1.67  | 1.72  | 1.67±0.05 <sup>j</sup>  |
| Comamonadaceae                     | 11.14 | 11.06   | 10.89 | 11.03±0.13 <sup>c</sup>  | 1.32  | 1.31  | 1.28  | 1.30±0.02 <sup>o</sup>  | 1.39  | 1.42  | 1.47  | 1.43±0.04 <sup>i</sup>  | 0.79  | 0.88  | 0.94  | 0.87±0.08 <sup>m</sup>  |
| Cytophagaceae                      | 7.89  | 7.83    | 7.92  | 7.88±0.05 <sup>d</sup>   | 0.86  | 0.92  | 0.93  | 0.90±0.04 <sup>p</sup>  | 0.66  | 0.57  | 0.63  | 0.62±0.05 <sup>j</sup>  | 1.38  | 1.42  | 1.51  | 1.44±0.07 <sup>k</sup>  |
| Gaiellaceae                        | 0.46  | 0.45    | 0.5   | 0.47±0.03 <sup>n</sup>   | 2.89  | 2.78  | 2.84  | 2.84±0.06 <sup>l</sup>  | 3.55  | 3.52  | 3.51  | 3.53±0.02 <sup>f</sup>  | 2.31  | 2.32  | 2.33  | 2.32±0.01 <sup>h</sup>  |
| Hypomicrobiaceae                   | 0.98  | 0.92    | 0.91  | 0.94±0.04 <sup>m</sup>   | 3.79  | 3.72  | 3.79  | 3.77±0.04 <sup>i</sup>  | 3.44  | 3.5   | 3.51  | 3.48±0.04 <sup>f</sup>  | 1.41  | 1.42  | 1.52  | 1.45±0.06 <sup>k</sup>  |
| Koribacteraceae                    | 0.022 | 0.026   | 0.021 | 0.02±0.001 <sup>pq</sup> | 26.69 | 26.72 | 26.66 | 26.69±0.03 <sup>a</sup> | 32.09 | 32.14 | 32.17 | 32.13±0.04 <sup>a</sup> | 9.92  | 9.98  | 9.81  | 9.90±0.09 <sup>c</sup>  |
| Other                              | 19.92 | 19.71   | 19.96 | 19.86±0.13 <sup>a</sup>  | 14.69 | 14.58 | 14.69 | 14.65±0.06 <sup>b</sup> | 11.56 | 11.53 | 11.63 | 11.57±0.05 <sup>c</sup> | 15.7  | 15.77 | 15.66 | 15.71±0.06 <sup>b</sup> |
| Rhodospirillaceae                  | 2.51  | 2.51    | 2.43  | 2.48±2.48 <sup>l</sup>   | 6.62  | 6.67  | 6.62  | 6.64±0.03 <sup>d</sup>  | 2.5   | 2.46  | 2.51  | 2.49±0.03 <sup>g</sup>  | 4.68  | 4.62  | 4.73  | 4.68±0.06 <sup>f</sup>  |
| Sinobacteraceae                    | 3.62  | 3.64    | 3.62  | 3.63±0.01 <sup>i</sup>   | 2.64  | 2.65  | 2.57  | 2.62±0.04 <sup>m</sup>  | 1.48  | 1.52  | 1.51  | 1.50±0.02 <sup>hi</sup> | 5.76  | 5.82  | 5.67  | 5.75±0.08 <sup>e</sup>  |
| Solibacteraceae                    | 0.3   | 0.31    | 0.27  | 0.29±0.02 <sup>o</sup>   | 5.41  | 5.46  | 5.42  | 5.43±0.03 <sup>e</sup>  | 1.28  | 1.31  | 1.31  | 1.30±0.02 <sup>i</sup>  | 1.42  | 1.37  | 1.36  | 1.38±0.03 <sup>k</sup>  |
| Streptococcaceae                   | 6.35  | 6.28    | 6.24  | 6.29±0.06 <sup>g</sup>   | 1.97  | 1.98  | 1.87  | 1.94±0.06 <sup>n</sup>  | 5.22  | 5.37  | 5.24  | 5.28±0.08 <sup>e</sup>  | 38.74 | 38.79 | 38.33 | 38.62±0.25 <sup>a</sup> |
| unclassified-Betaproteobacteria(c) | 11.02 | 11.08   | 11.04 | 11.05±0.03 <sup>bc</sup> | 0.89  | 0.97  | 0.76  | 0.87±0.11 <sup>p</sup>  | 0.32  | 0.34  | 0.45  | 0.37±0.07 <sup>j</sup>  | 0.16  | 0.12  | 0.18  | 0.15±0.03 <sup>p</sup>  |
| unclassified-Ellin329(o)           | 0.38  | 0.32    | 0.33  | 0.34±0.03 <sup>o</sup>   | 3.16  | 3.18  | 3.11  | 3.15±0.04 <sup>j</sup>  | 3.33  | 3.31  | 3.42  | 3.35±0.06 <sup>f</sup>  | 1.32  | 1.45  | 1.41  | 1.39±0.07 <sup>k</sup>  |
| unclassified-Ellin6513(o)          | 0.12  | 0.11    | 0.09  | 0.11±0.11 <sup>p</sup>   | 2.94  | 2.94  | 2.96  | 2.95±0.01 <sup>k</sup>  | 0.18  | 0.22  | 0.21  | 0.20±0.02 <sup>j</sup>  | 2.11  | 1.94  | 1.88  | 1.98±0.12 <sup>i</sup>  |
| unclassified-envOPS12(o)           | 4.55  | 4.54    | 4.45  | 4.51±0.06 <sup>h</sup>   | 5.22  | 5.26  | 5.16  | 5.21±0.05 <sup>f</sup>  | 0.55  | 0.52  | 0.55  | 0.54±0.02 <sup>j</sup>  | 0.04  | 0.02  | 0.03  | 0.03±0.01 <sup>p</sup>  |
| unclassified-iii1-15(o)            | 7.5   | 7.48    | 7.62  | 7.53±0.08 <sup>e</sup>   | 4.39  | 4.32  | 4.42  | 4.38±0.05 <sup>g</sup>  | 1.93  | 1.82  | 1.93  | 1.89±0.06 <sup>h</sup>  | 1.14  | 1.12  | 1.17  | 1.14±0.03 <sup>l</sup>  |
| unclassified-MND1(o)               | 11.18 | 11.15   | 11.08 | 11.14±0.05 <sup>b</sup>  | 0.48  | 0.49  | 0.37  | 0.45±0.07 <sup>q</sup>  | 0.31  | 0.34  | 0.31  | 0.32±0.02 <sup>j</sup>  | 0.28  | 0.34  | 0.32  | 0.31±0.03 <sup>o</sup>  |
| unclassified-Solibacterales(o)     | 2.66  | 2.69    | 2.57  | 2.64±0.06 <sup>k</sup>   | 2.8   | 2.86  | 2.75  | 2.80±0.06 <sup>l</sup>  | 1.42  | 1.46  | 1.53  | 1.47±0.06 <sup>i</sup>  | 0.62  | 0.55  | 0.78  | 0.65±0.12 <sup>n</sup>  |
| Xanthomonadaceae                   | 6.92  | 6.96    | 6.85  | 6.91±0.06 <sup>f</sup>   | 4.08  | 4.09  | 4.04  | 4.07±0.03 <sup>h</sup>  | 9.01  | 10.09 | 11.13 | 10.08±1.06 <sup>d</sup> | 4.31  | 4.36  | 4.41  | 4.36±0.05 <sup>g</sup>  |

Note: Numbers with different letters in the same column are significantly different according to Duncan's shortest significant range test ( $P < 0.05$ ).

| Supplementary Table S7.1 ANOVA |                     |                |                    |             |          |         |
|--------------------------------|---------------------|----------------|--------------------|-------------|----------|---------|
| Sample                         | Source of variation | Sum of squares | Degrees of freedom | Mean square | F Value  | p Value |
| RT                             | Treatment between   | 1573.996       | 19                 | 82.8419     | 24446.47 | 0.0001  |
|                                | Treatment interior  | 0.1355         | 40                 | 0.0034      |          |         |
|                                | Total variation     | 1574.131       | 59                 |             |          |         |
| RC                             | Treatment between   | 2053.702       | 19                 | 108.0896    | 40865.64 | 0.0001  |
|                                | Treatment interior  | 0.1058         | 40                 | 0.0026      |          |         |
|                                | Total variation     | 2053.808       | 59                 |             |          |         |
| TC                             | Treatment between   | 3450.068       | 19                 | 181.5825    | 3124.807 | 0.0001  |
|                                | Treatment interior  | 2.3244         | 40                 | 0.0581      |          |         |
|                                | Total variation     | 3452.393       | 59                 |             |          |         |
| CC                             | Treatment between   | 4414.155       | 19                 | 232.324     | 33063.23 | 0.0001  |
|                                | Treatment interior  | 0.2811         | 40                 | 0.007       |          |         |
|                                | Total variation     | 4414.437       | 59                 |             |          |         |
